# Supplementary material
Source: publisher figshare collection journal article supplement (https://springernature.figshare.com/ndownloader/files/19887854)
Supplement: Supplementary file [file 19887854]

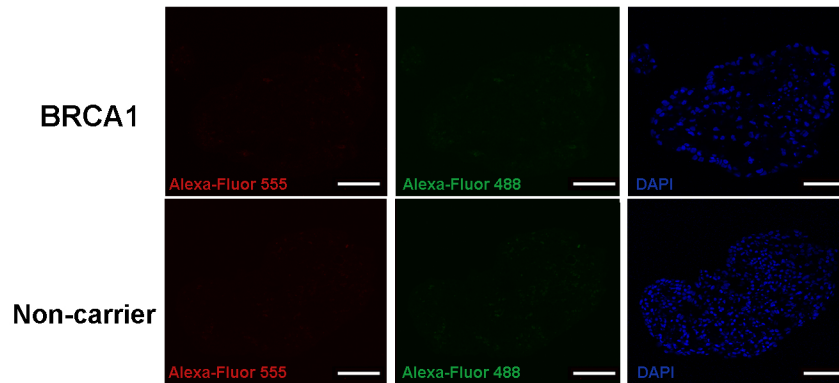

**Supplemental Figure 2: Immunofluorescent negative controls.**

BRCA1<sup>mut</sup> and Non-Carrier organoids were fluorescently stained with no primary antibody and Alexa-Fluor 555 (red) and 488 (green) secondary antibody and DAPI (blue) to visualize the nuclei. Scale bar, 100  $\mu$ m.
